# Supplementary material
Source: PubMed Central journal article supplement (PMC3144116)
Supplement: supp_0022034511401622_DS_10.1177_0022034511401622.pdf [file supp_0022034511401622_DS_10.1177_0022034511401622.pdf]

## RESEARCH REPORTS

### Clinical

P.A. Andrade Filho<sup>1</sup>, A. Letra<sup>2</sup>, A. Cramer<sup>2</sup>,  
J.L. Prasad<sup>3</sup>, G.P. Garlet<sup>4</sup>, A.R. Vieira<sup>2</sup>,  
R.L. Ferris<sup>1</sup>, and R. Menezes<sup>2\*</sup>

<sup>1</sup>Department of Otolaryngology and Immunology, Hillman Cancer Institute, University of Pittsburgh; <sup>2</sup>Department of Oral Biology, Center for Craniofacial and Dental Genetics, School of Dental Medicine, University of Pittsburgh, 619 Salk Hall, 3501 Terrace St., Pittsburgh, PA, 15261, USA; <sup>3</sup>Department of Diagnostic Sciences, School of Dental Medicine, University of Pittsburgh; and <sup>4</sup>Department of Biological Sciences, School of Dentistry of Bauru, University of São Paulo, Brazil; \*corresponding author, rms59@pitt.edu

*J Dent Res* DOI: 10.1177/0022034511401622

## APPENDIX

**Appendix Table.** Sequence of Primers Used in This Study for the Amplification of the Respective Genes

| Gene                 | Primer Sequence                                          |
|----------------------|----------------------------------------------------------|
| Human <i>WNT3A</i>   | F:5'CTGTTGGGCCACAGTATTCC3'<br>R:5'CACTCCTGGATGCCAATCTT3' |
| Human <i>GSK3B</i>   | F:5'GCCAAGTGACAAAGGAAGGA3'<br>R:5'CTCCTCGACTGTCCCCATT3'  |
| Human <i>WNT11</i>   | F:5'GTCCTCCTGGGTGTGAC3'<br>R:5'CATAGCACACGCCGGTCT3'      |
| Human <i>AXIN1</i>   | F:5'TGAAGTGGGCTGAGTCACTG3'<br>R:5'CTTTCGGTAGATGGCTCTCG3' |
| Human <i>AXIN2</i>   | F:5'CTCAGTAACAGCCCCGAGAGC3'<br>R:5'TTTACAGCAGGGCCTTCG3'  |
| Human $\beta$ -actin | F:5'GGCACCCAGCACAATGAAG3'<br>R:5'CCGATCCACACGGAGTACTTG3' |

# Insights from Studies with Oral Cleft Genes Suggest Associations between WNT-pathway Genes and Risk of Oral Cancer

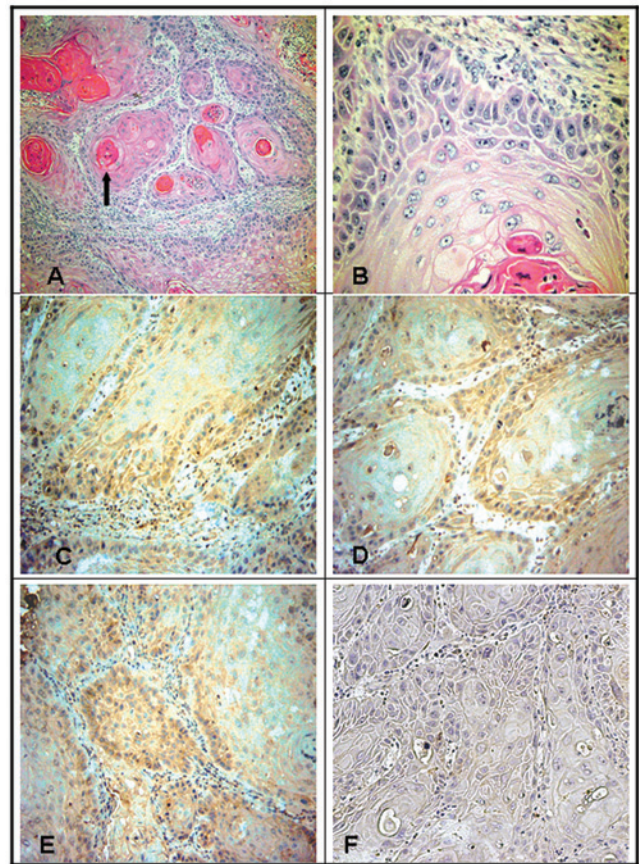

**Appendix Figure.** Histological and immunohistochemical analysis of *GSK3B* in serial sections of formalin-fixed, paraffin-embedded tissue from a representative oral squamous cell carcinoma specimen (74-year-old male patient diagnosed with oral squamous cell carcinoma of the right lateral tongue). (A,B) Well-differentiated oral squamous cell carcinoma (hematoxylin & eosin stain, 10x and 40x, respectively). Keratin pearl formation is evident (black arrow). (C,D,E) Strong cytoplasmic staining of tumor cells with *GSK3B* in the same tumor (20x). (F) Negative control (40x).
